# Supplementary material for: Highly adhesive chitosan/poly(vinyl alcohol) hydrogels via the synergy of phytic acid and boric acid and their application as highly sensitive and widely linear strain sensors
Source: Royal Society of Chemistry journal article supplement (doi:10.1039/d3mh00739a), 2023-01-01
Supplement: d3mh00739a1.pdf [file d3mh00739a1.pdf]

Supporting information

**Highly adhesive chitosan/poly(vinyl alcohol) hydrogels via the synergy of phytic acid and boric acid and their application as highly sensitive and widely linear strain sensors**

**Cuiwen Liu, Ru Zhang, Yao Wang, Chengmeng Wei, Feng Li, Ning Qing, Liuyan Tang\***

School of Biotechnology and Health Sciences, Wuyi University, Jiangmen, 529020, China

\*Corresponding author.

E-mails: wyuchemtangly@126.com; tangly@wyu.edu.cn (Liuyan Tang)

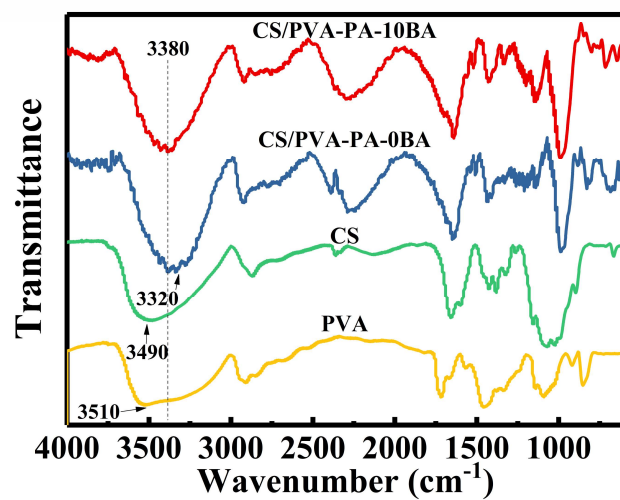

**Fig. S1.** FTIR spectra of CS/PVA-PA-10BA hydrogel, CS/PVA-PA-0BA hydrogel, CS and PVA with a highlight of the O-H and N-H bands.

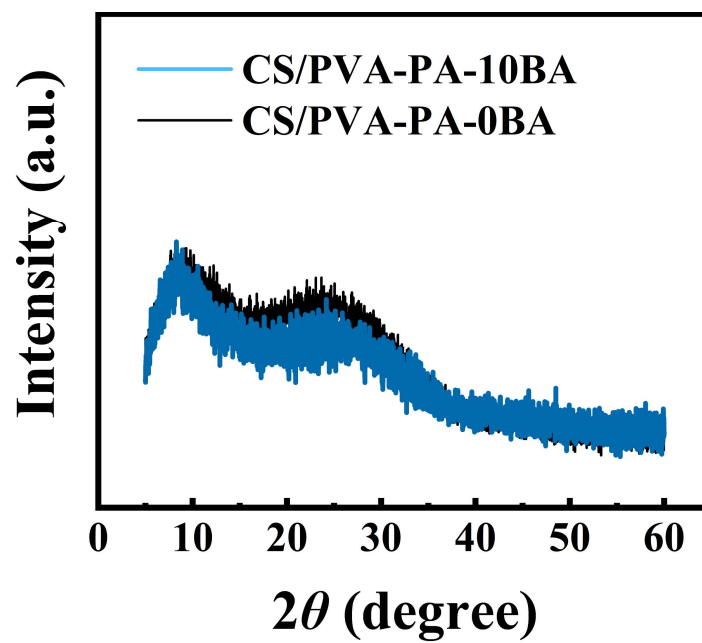

**Fig. S2.** XRD spectra of the CS/PVA-PA-0BA and CS/PVA-PA-10BA hydrogels.

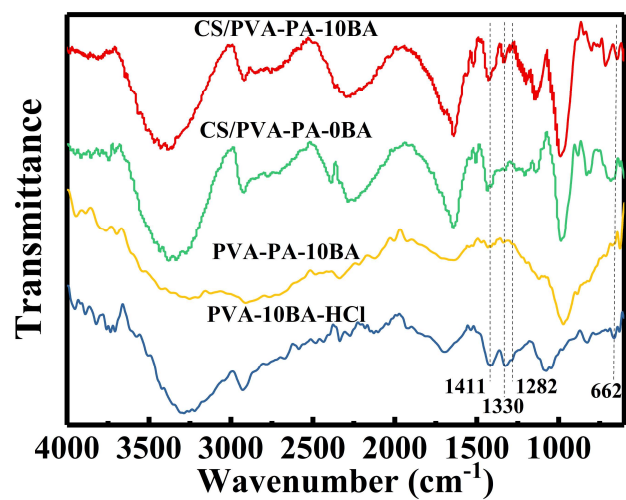

**Fig. S3.** FTIR spectra of the CS/PVA-PA-10BA, CS/PVA-PA-0BA, PVA-PA-10BA and PVA-10BA-HCl hydrogels.

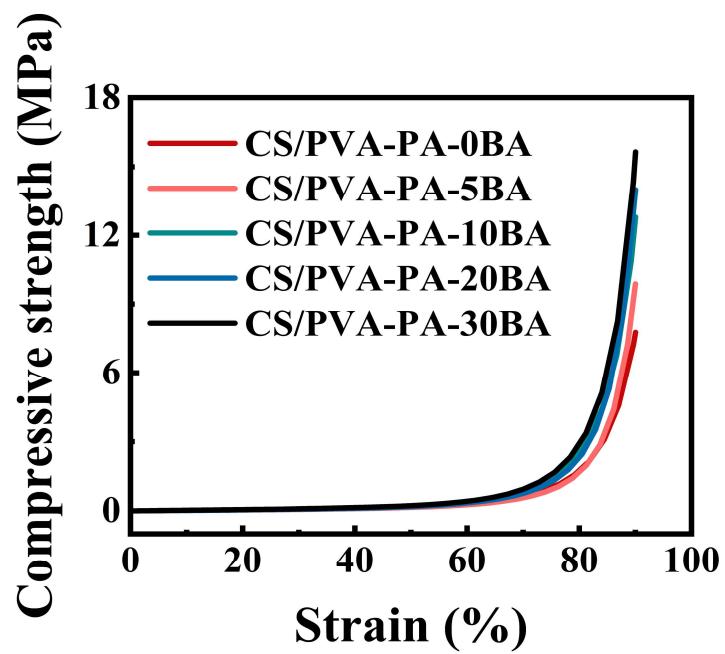

Fig. S4. Compressive stress-strain curves of CS/PVA-PA-BA hydrogels.

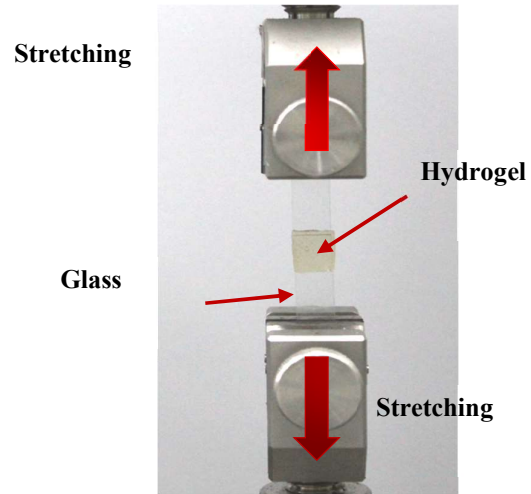

**Fig. S5.** Schematic illustration of the lap shear test.

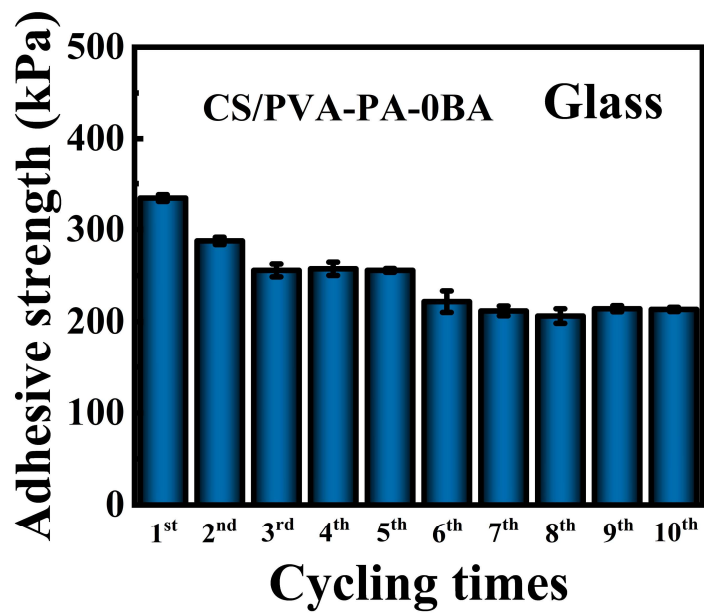

**Fig. S6.** Adhesive strength of CS/PVA-PA-0BA hydrogel under repeatedly bonding to glass substrates for 10 cycles.

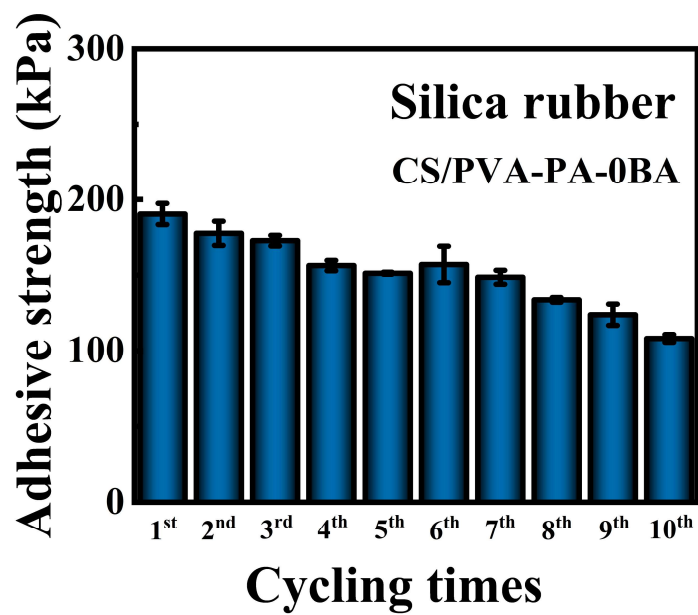

**Fig. S7.** Adhesive strength of CS/PVA-PA-0BA hydrogel under repeatedly bonding to silica rubber for 10 cycles.



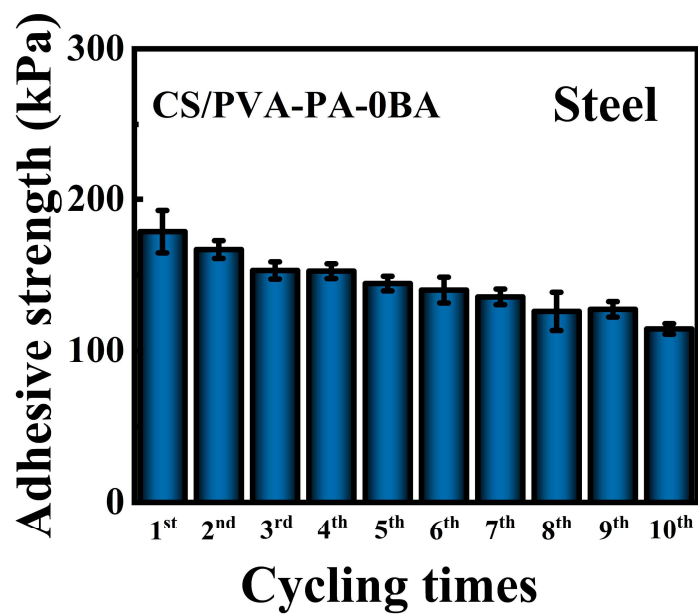

**Fig. S8.** Adhesive strength of CS/PVA-PA-0BA hydrogel under repeatedly bonding to steel substrates for 10 cycles.

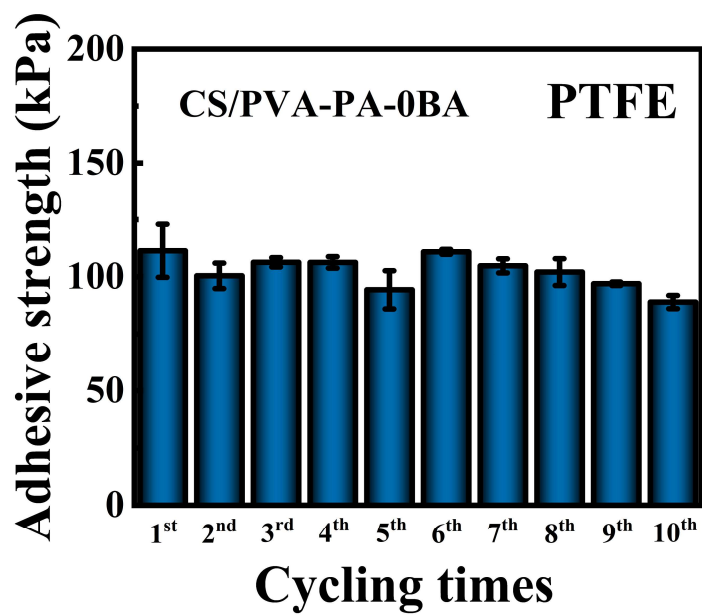

**Fig. S9.** Adhesive strength of CS/PVA-PA-0BA hydrogel under repeatedly bonding to PTFE substrates for 10 cycles.

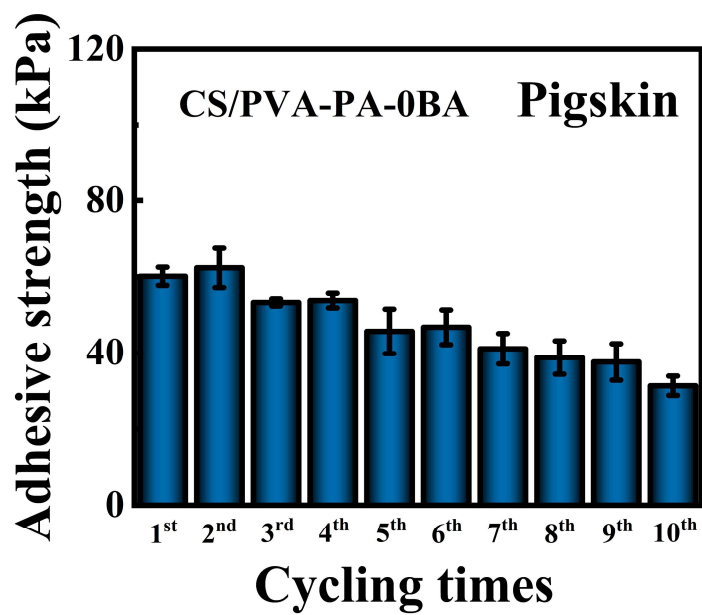

**Fig. S10.** Adhesive strength of CS/PVA-PA-0BA hydrogel under repeatedly bonding to pigskin for 10 cycles.

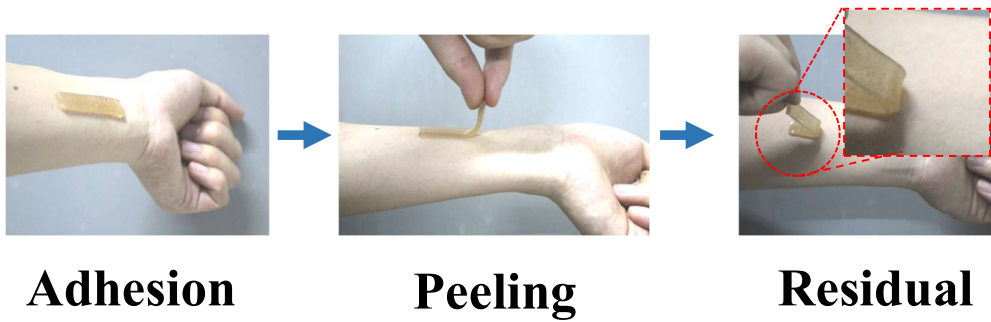

**Fig. S11.** Photographs of CS/PVA-PA-10BA hydrogel before and after adhering to the skin.

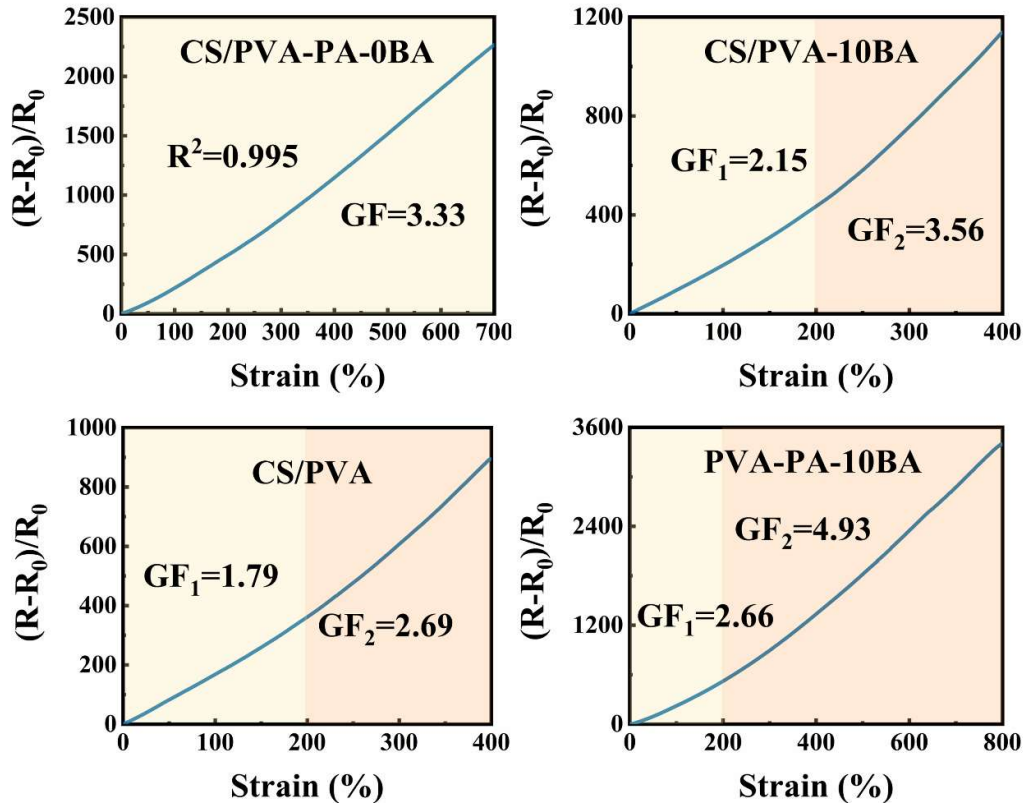

**Fig. S12.** Relative resistance changes and the GF of the strain sensors based on CS/PVA-PA-10BA, CS/PVA-PA-0BA, CS/PVA-10BA, CS/PVA, and PVA-PA-10BA hydrogels under various tensile strains.

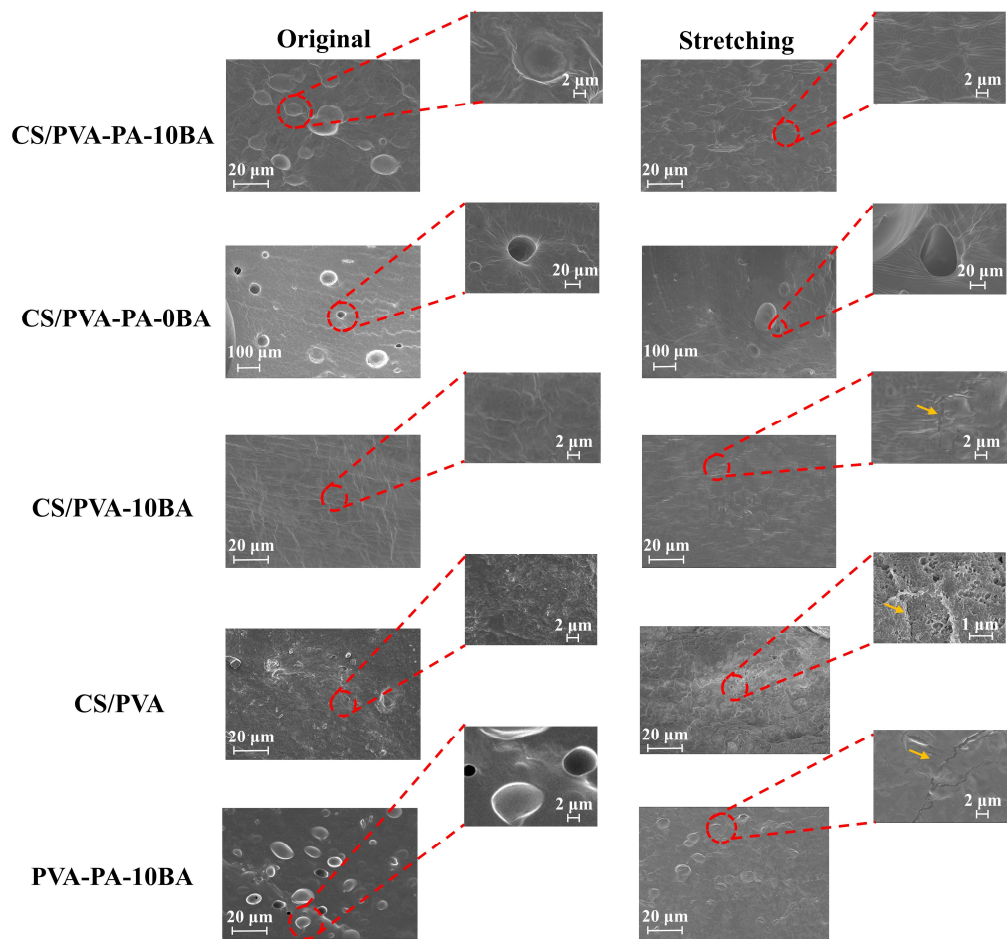

**Fig. S13.** SEM images of CS/PVA-PA-10BA, CS/PVA-PA-0BA, CS/PVA-10BA, CS/PVA, and PVA-PA-10BA hydrogels before and during stretching.

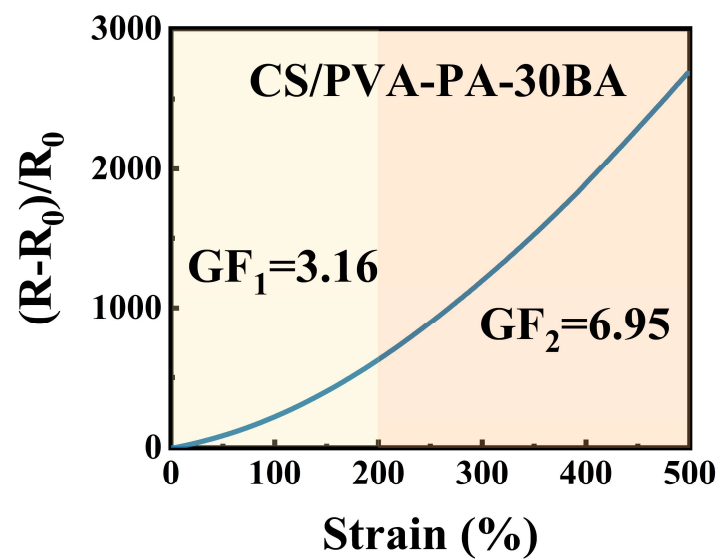

**Fig. S14.** Relative resistance changes and the GF of the strain sensors based on CS/PVA-PA-30BA hydrogel under various tensile strains.

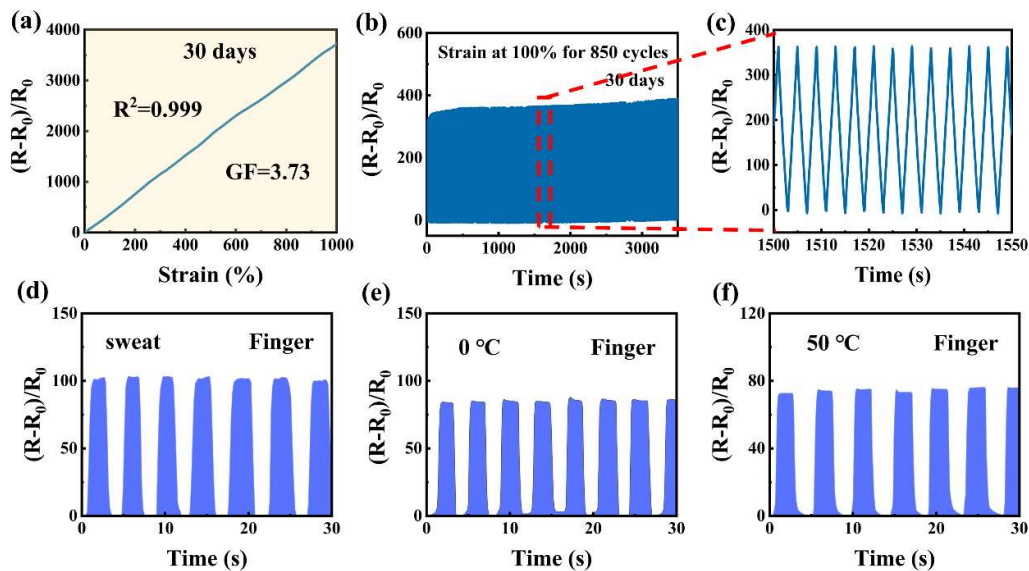

**Fig. S15.** The stability of CS/PVA-PA-10BA hydrogel-based strain sensor under different environmental conditions. (a) Relative resistance changes and the GF of the strain sensor under various tensile strains (0-1000%) after 30-day storage. (b) Relative resistance changes of the strain sensor under 850 loading-unloading cycles at 100% strain after 30-day storage. (c) A zoom-in view of the relative resistance changes from the loading-unloading cycles. Real-time monitoring of finger bending under (d) sweaty condition, (e) at 0 °C, and (f) at 50 °C.



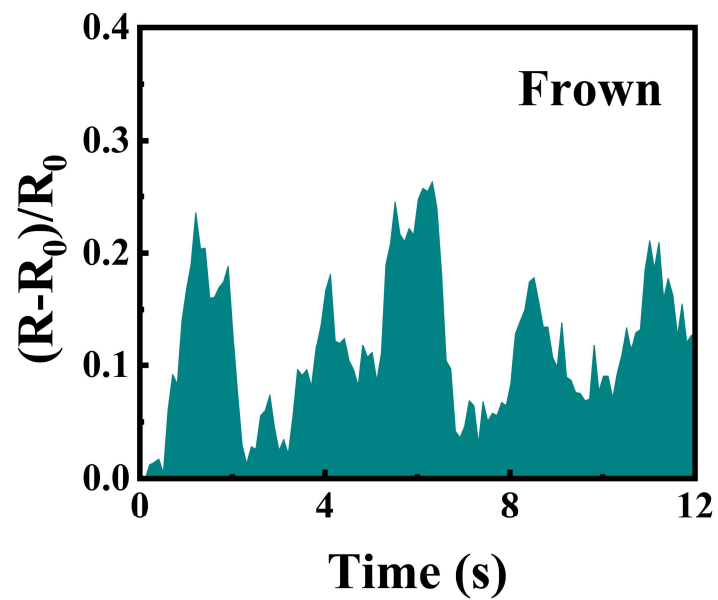

**Fig. S16.** Real-time monitoring of human frowning by CS/PVA-PA-10BA hydrogel-based strain sensor.

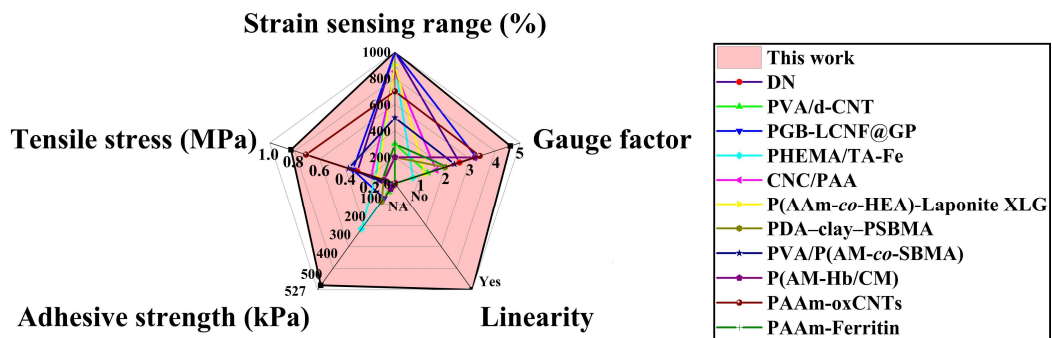

**Fig. S17.** Comparison of the tensile stress, adhesive strength, strain sensing range, gauge factor, and linearity between the strain sensor in this work and other strain sensors that have been reported previously.

**Table S1.** Comparison of the strain sensor in this work with other reported strain sensors.

| Hydrogel                   | Tensile stress (MPa) | Adhesive strength (kPa) | Strain sensor range (%)     | Linearity | Gauge factor         | Ref       |
|----------------------------|----------------------|-------------------------|-----------------------------|-----------|----------------------|-----------|
| CS/PVA-PA-10PB             | 0.830                | 527                     | 0-1000                      | Yes       | 4.61                 | This work |
| DN                         | 0.300                | 20.87                   | 0-450<br>500-1000           | No        | 2.58<br>1.89         | 1         |
| PVA/d-CNT                  | 0.00068              | 45.6                    | 0-100<br>100-175<br>175-300 | No        | 1.08<br>1.04<br>1.30 | 2         |
| PGB-LCNF@GP                | 0.336                | 76.8                    | 0-500<br>500-1000           | No        | 1.17<br>3.24         | 3         |
| PHEMA/TA-Fe                | 0.155                | 238                     | 0-500<br>500-900            | No        | 0.55<br>0.72         | 4         |
| CNC/PAA                    | 0.190                | 3.1                     | 0-65<br>65-470<br>470-850   | No        | 0.57<br>1.03<br>1.65 | 5         |
| P(AAm-co-HEA)-Laponite XLG | 0.140                | 27.6                    | 0-100<br>100-900            | No        | 0.5<br>1.2           | 6         |
| PDA-clay-PSBMA             | 0.090                | 94.3                    | 0-80<br>80-200              | No        | 1.25<br>2            | 7         |
| PVA/P(AM-co-SBMA)          | 0.370                | 11.7                    | 0-10<br>10-100<br>100-500   | No        | 0.79<br>1.35<br>2.38 | 8         |
| P(AM-Hb/CM)                | 0.085                | 30                      | 0-110<br>110-200            | No        | 0.9<br>3.2           | 9         |
| PAAm-oxCNTs                | 0.71                 | NA                      | 0-250<br>250-700            | No        | 1.5<br>3.39          | 10        |
| PAAm-Ferritin              | 0.099                | NA                      | 0-30<br>30-150<br>150-300   | No        | 0.55<br>1.94<br>2.06 | 11        |

**Table S2.** The detailed compositions of the hydrogels.

| Sample         | PVA (g) | CS (g) | PA (mL) | H <sub>2</sub> O (mL) | BA (g) | BA/H <sub>2</sub> O (wt%) |
|----------------|---------|--------|---------|-----------------------|--------|---------------------------|
| CS/PVA-PA-0BA  | 1.50    | 0.30   | 4       | 1                     | 0      | 0                         |
| CS/PVA-PA-5BA  | 1.50    | 0.30   | 4       | 1                     | 0.05   | 5                         |
| CS/PVA-PA-10BA | 1.50    | 0.30   | 4       | 1                     | 0.1    | 10                        |
| CS/PVA-PA-20BA | 1.50    | 0.30   | 4       | 1                     | 0.2    | 20                        |
| CS/PVA-PA-30BA | 1.50    | 0.30   | 4       | 1                     | 0.3    | 30                        |
| CS/PVA         | 1.50    | 0.3    | 0       | 5                     | 0      | 0                         |
| CS/PVA-2BA     | 1.50    | 0.3    | 0       | 5                     | 0.1    | 2                         |
| PVA-PA-10BA    | 1.50    | 0      | 4       | 1                     | 0.1    | 10                        |
| PVA-PA         | 1.50    | 0      | 5       | 0                     | 0      | 0                         |

## References

- 1 H. Zhou, J. Lai, X. Jin, H. Liu, X. Li, W. Chen, A. Ma and X. Zhou, *Chem. Eng. J.*, 2021, **413**, 127544.
- 2 H. Zhu, J. Xu, X. Sun, Q. Guo, Q. Guo, M. Jiang, K. Wu, R. Cai and K. Qian, *J. Mater. Chem. A*, 2022, **10**, 23366–23374.
- 3 F. Lin, Y. Qiu, X. Zheng, Z. Duanmu, Q. Lu, B. Huang, L. Tang and B. Lu, *Chem. Eng. J.*, 2022, **437**, 135286.
- 4 F. Wang, C. Chen, J. Wang, Z. Xu, F. Shi and N. Chen, *Colloids Surfaces A Physicochem. Eng. Asp.*, 2023, **658**, 130591.
- 5 W. Ma, W. Cao, T. Lu, Z. Jiang, R. Xiong, S. K. Samal and C. Huang, *ACS Appl. Mater. Interfaces*, 2021, **13**, 58048–58058.
- 6 Z. He and W. Yuan, *ACS Appl. Mater. Interfaces*, 2021, **13**, 53055–53066.
- 7 X. Pei, H. Zhang, Y. Zhou, L. Zhou and J. Fu, *Mater. Horizons*, 2020, **7**, 1872–1882.
- 8 Z. Zhou, Z. He, S. Yin, X. Xie and W. Yuan, *Compos. Part B Eng.*, 2021, **220**, 108984.
- 9 M. Pan, M. Wu, T. Shui, L. Xiang, W. Yang, W. Wang, X. Liu, J. Wang, X. Z. Chen and H. Zeng, *J. Colloid Interface Sci.*, 2022, **622**, 612–624.
- 10 X. Sun, Z. Qin, L. Ye, H. Zhang, Y. U. Qingyu, W. U. Xiaojun, J. Li and F. Yao, *Chem. Eng. J.*
- 11 R. Wang, W. Chi, F. Wan, J. Wei, H. Ping, Z. Zou, J. Xie, W. Wang and Z. Fu, *ACS Appl. Mater. Interfaces*, 2022, **14**, 21278–21286.
